# Supplementary material
Source: PubMed Central journal article supplement (PMC2449339)
Supplement: 0801559105_Supplemental_PDF.pdf [file 0801559105_Supplemental_PDF.pdf]

# Supporting Information

Abdel-latif *et al.* 10.1073/pnas.0801559105

## SI Text

**Preparation of ( $\pm$ )-[ $^{13}\text{C}_{18}$ ]-Erythro-12,13-Epoxy-9Z-Octadecenoic acid (( $\pm$ )-[ $^{13}\text{C}_{18}$ ]-Vernolic Acid).** Ten milliliters of methanol and 1 ml of acetyl chloride were stirred under dry nitrogen at 0°C for 10 min. One hundred milligrams of (0.34 mmol) [ $^{13}\text{C}_{18}$ ]-linoleic acid (Campro Scientific) was added and the solution was stirred for 1 h at room temperature. Subsequently, the mixture was diluted with 5 ml of a 5%  $\text{NaHCO}_3$  solution and extracted twice with 50 ml of hexane. The hexane phase was washed with brine, dried with  $\text{Na}_2\text{SO}_4$ , and evaporated under reduced pressure. The crude ester was dissolved in 8 ml of  $\text{CH}_2\text{Cl}_2$  and 58.6 mg (0.34 mmol) of *m*-chloroperbenzoic acid was added and stirred overnight. Sixty milligrams (1.5 mmol) of CaO was added to the solution and subsequently stirred for 20 min, filtrated, and evaporated.

The mixture of reaction products was subjected to flash chromatography with 30 g of silica gel (Merck; 0.015–0.04 mm) with gradient elution using a mixture of petroleum benzene and ethyl acetate (200 ml of 95:5, 100 ml of 92.5:7.5, and 200 ml of 90:10). The elution sequence and amount of products was: (i) [ $^{13}\text{C}_{18}$ ]-methyl linoleate 30 mg, (ii) ( $\pm$ )-[ $^{13}\text{C}_{18}$ ]-erythro-12,13-epoxy-9Z-octadecenoic acid methyl ester (( $\pm$ )-[ $^{13}\text{C}_{18}$ ]-vernolic

acid methyl ester) 7 mg, (iii) ( $\pm$ )-[ $^{13}\text{C}_{18}$ ]-erythro-9,10-epoxy-12Z-octadecenoic acid methyl ester (( $\pm$ )-[ $^{13}\text{C}_{18}$ ]-coronaric acid methyl ester) 7 mg, 4) 9,10,12,13-diepoxystearic acid methyl ester 35 mg. 7 mg (23  $\mu\text{mol}$ ) of ( $\pm$ )-[ $^{13}\text{C}_{18}$ ]-vernolic acid methyl ester was dissolved in 100  $\mu\text{l}$  of acetonitrile, 0.55 mg (46  $\mu\text{mol}$ ) of LiOH was added and stirred for 48 h at room temperature. The solution was neutralized with 1 N HCl, stirred for 1 h, diluted with 10 ml, water, acidified to pH 3 with 1 N HCl, and finally extracted with diethyl ether (3  $\times$  30 ml). The combined ether phase was washed with brine, dried over  $\text{Na}_2\text{SO}_4$ , and evaporated. The crude acid was applied to a LC column containing 5 g of silica gel (Merck, 0.063–0.2 mm) and eluted with 200 ml of petroleum benzene:ethyl acetate:acetic acid 94:5:1 to yield 5 mg of pure ( $\pm$ )-[ $^{13}\text{C}_{18}$ ]-erythro-12,13-epoxy-9Z-octadecenoic acid. GC-MS-analysis of the product was done with the methyl ester by derivatization with trimethylsulfonium hydroxide (Macherey & Nagel). The  $^{13}\text{C}$ -labeled compound coeluted with an unlabeled reference chemical (vernolic acid methylester, purity 99%, Sigma–Aldrich). The mass spectrum of the labeled product is shown in Fig. S4.

(Nas. EH1. F4)

1 ATGTGGAAGGGCGCTGCGGTTTTCCTACTAGCCACGCTGGCCATCGGCTGGCATCTCAGG  
 1 M W K G A A V F L L A T L A I G W H L R  
 61 TATCAAGGACCCGTGGAGGTACCTGACTTGCCGAATCAATACTGGGGTCTGGAAAGCCT  
 21 Y Q G P V E V P D L P N Q Y W G P G K P  
 121 GTGCCAGATCCCAAGGATATCAAACCGTTCAAATCGACGTTCCAAAAGAGGTAATCGAT  
 41 V P D P K D I K P F K I D V P K E V I D  
 181 GATCTAAACAAACGCCTTGATAGTACGAGATCATTTGTGGAACCGCTGGAAGGTTCTGCC  
 61 D L N K R L D S T R S F V E P L E G S A  
 241 TGGACTTACGGTATCTCGTCGACCTACTTGAAGACCGTCTTGAACCACTGGAGGAAGAAA  
 81 W T Y G I S S T Y L K T V L N H W R K K

(Nas. EH1. F3)

301 TATAACTGGAGCCAACGGCAGGCTCTGCTCAACAAATACCCGCAGTTC AAGACCAAGATT  
 101 Y N W S Q R Q A L L N K Y P Q F K T K I  
 361 CAAGGTCTGGACATCCACTTCTACCATGTAAAGCCCAGGTACCTAAAGACCGCAAGGTC  
 121 Q G L D I H F Y H V K P Q V P K D R K V  
 421 CGTGTCTGCCACTTTTGATGCTCCACGGCTGGCCAGGATCCATCGTCGAGTTCAGAAG  
 141 R V L P L L M L H G W P G S I V E F Q K  
 481 ATTATCCCCATGCTCACGACAGCCAAGCCCCGATGAAAACCTTCGTCTTCGAGCTGATCATC  
 161 I I P M L T T A K P D E N F V F E L I I  
 541 CCATCTCTGCCCGGATATGGATTCTCCCAAGCTGCCGCTAGACCCGGTCTTGGACCTGCT  
 181 P S L P G Y G F S Q A A A R P G L G P A

(Nas. EH1. dF1 and F1)

601 CAGATGGCTGTTGTCTTCAAAAACCTGATGCAAAGACTCGGTTTCGAGCAGTTC TACTACT  
 201 Q M A V V F K N L M Q R L G F E Q F Y T  
 661 CAGGGTGGTACTGGGGCAGTCTCATCACTGCCAACATGGCTGTGCTGTATCCCAAAAAG  
 221 Q G G D W G S L I T A N M A V L Y P K K

(Nas. EH1. F2)

721 GTCATAGGAACTCACCTGAATATGTGCTTCATCGAATCGCATAAGGCTCACTTCTTATCG  
 241 V I G T H L N M C F I E S H K A H F L S  
 781 CTCGTCGGCGGTACATCCCATCTCTGGTCGTCGACAGCGAGCATTACTCCAAGATGTAT  
 261 L V G A Y I P S L V V D S E H Y S K M Y

(Nas. EH1. R2)

841 CCGTTGTCCTACCACTTCGGCCGCTTGATCGAAGAGACCGGTTACTTGCACATCCAGGCT  
 281 P L S Y H F G R L I E E T G Y L H I Q A  
 901 ACGAAACCTGAAACAGTTGGCGCCGCACTTACGGATTTCGCCGGCTGGTCTCGCCGCGTAC  
 301 T K P E T V G A A L T D S P A G L A A Y

(Nas. EH1. dR1 and R1)

961 ATCCTTGAGAAGTT CAGCACCTGGACGAATCCAGACTATAGGTTCCGCGACGATGGTGG  
 321 I L E K F S T W T N P D Y R F R D D G G  
 1021 CTTCTGGAGAAGTTACCATGGACGAGCTTTTGACAACCTCATGGTCTACTGGGTGACC  
 341 L L E K F T M D E L L D N L M V Y W V T  
 1081 AACTCCATCACCACAGTCAGCGACTCTACGCCAATGCTTCAGCAAGGCCAACAGGGAG  
 361 N S I T T S Q R L Y A E C F S K A N R E

(Nas. EH1. R3)

1141 CTCGGAGTTGACAAAATGCCGATCTTCGTGCCAACC GCCTGTGCCAACTTCCCGCACGAG  
 381 L G V D K M P I F V P T A C A N F P H E  
 1201 TTGGCCTACAGGTTCGAAACCATCCTCAAGGAACGTTT CACGAACCTGGTCCAGTTCACT  
 401 L A Y R S E T I L K E R F T N L V Q F T  
 1261 CATCCTCCACGAGGTGGTCACTTCGCCGCTTTT GAGGAGCCCGAACTTCTGGCCAACGAC  
 421 H P P R G G H F A A F E E P E L L A N D  
 1321 GTCTGGAGCTTTGTGCACAAGCTCGAGCAGCGACTCAGTGATGAGAAACGACAGAAGCAG  
 441 V W S F V H K L E Q R L S D E K R Q K Q

(Nas. EH1. R4)

1381 GAGGCCAAGAAAGAAAAGGCGAAGAAGGCGTGA  
 461 E A K K E K A K K A \*

**Fig. S1.** Nucleotide and deduced amino acid sequences of the putative *Nasonia vitripennis* epoxide hydrolase gene *Nasvi-EH1*. The sequences are numbered at the left. Stop codon indicated by asterisk. The *Nasvi-EH1* N terminus (EHN) is coded in italics, the abhydrodase.1 region is encoded in bold. Nucleotide sequences (5–3') of primers that were used in the gene amplification are underlined and written in italics. The primer names are given above the respective sequences.

|            |                                                               |     |
|------------|---------------------------------------------------------------|-----|
| Athro-JHEH | MTILKYSLIGVGLIVGISYLFNQGNGKAPKLGDWGPGKE-QKIVKDVVFPKVNFSKG     | 59  |
| Nasvi-EH1* | MGVLLWGFGLIVLIGGATIFISPP-VQPPKLTVDVWGPDEPKKTDTSVRPFKITFQKE    | 59  |
| Apime-EH   | --MYFHFHFI-----YLFVSVN-ELNVPTLPETNWSGSKN-EKESIEIRPFKIDVSKS    | 47  |
|            | * * * * *                                                     |     |
| Athro-JHEH | DIEDLKTRLKNTNRNLTPALENAGWTVGVDGKFPVKIVDYWLNKYDFKKREQYLNQYDQFV | 119 |
| Nasvi-EH1* | MLDDLNRNRLKNTRKMPPLENGWTVGLSGDFVVPVIVDHWLNKYDFKKREAHLNQYPQFI  | 119 |
| Apime-EH   | VLDDLKRYRLAHRRTFKKPLENGWTVGISTTYLNTVLDYWRDKYNWTERQALLNKYPQFM  | 107 |
|            | * * * * *                                                     |     |
| Athro-JHEH | TNIQGLNIHFLHVR---PKNSGGKRVLPPLLIQHGWPGSVVEFYKIPMLTTPRDDYDFVF  | 176 |
| Nasvi-EH1* | TNVQGLDIHFIVHKPQLPKNSK-IQVLPPLYLQHGWPGSIVVEFYKIPMLTTPRSDRNFVF | 178 |
| Apime-EH   | TTIQGLDIHFYHVKPNLPNNKN-LKVLPLMLHLGWPGSVVEFYKIPMLTKFWPQNQNFVF  | 166 |
|            | * * * * *                                                     |     |
| Athro-JHEH | EVIAPSLPGFGFSPGAVRPLGLAAQIAVVLKKNLMLRLGFKNFYQTGGDWGAIITAHMAVL | 236 |
| Nasvi-EH1* | EVVAPSLPGFGYSQAASKAGLGAVQMAHLMKNLMLRLGFDKFFYQTGGDWGAVIGANMASM | 238 |
| Apime-EH   | EVIVPSLPGYGFSEGAVRPGMANAQIAVIFKNLMQRLGFEKFFYVQGGDWGSVIASDMAVL | 226 |
|            | * * * * *                                                     |     |
| Athro-JHEH | FPEHVLGIHSNMCAVLQPQTFFTTYLYSYWPSLLVPDEDEYHLMYPLSKKWSRTIEETGYF | 296 |
| Nasvi-EH1* | YPQHVLMHNSMCLVVRPWTWLKIAAYSMLPSSLPEDE-RQLMFPLSTKLAGIEETGYL    | 297 |
| Apime-EH   | FPEKIIGLHNNMCTSLNLSNLFWLVFGTYFVPSLIGANEHYSKFFPVSEILSFLIEESGYF | 286 |
|            | * * * * *                                                     |     |
| Athro-JHEH | HIQATKPDTLGAALADSPAGLAAWILEKFGSTGTNPELRFKEDGGLFDIHSPELDDNVML  | 356 |
| Nasvi-EH1* | HLQATKPDITIGIVSDSPAGLAAYILEKMAYCTKPDNKFTDDGNLLEKFTMDELIDNLM   | 357 |
| Apime-EH   | HIQATKPDITIGAALTASPDALAAYILEKFSVWTKNTYKKQDDGGITEKFLVDELDDNIMI | 346 |
|            | * * * * *                                                     |     |
| Athro-JHEH | YWMPNSMTTAIRIYAETFSANRALRMDYVPIEVPSACAQFPHEISYQPPSLLSARYKKL   | 416 |
| Nasvi-EH1* | YWAPNKASSFRIYAESFNKQTFGYKMDNVPTVPSACAQFPYEIFQSANFLRDRFVNL     | 417 |
| Apime-EH   | YWITNSITTSVRLYAENYTSYRSLSKIDQLPIKVFTACAVFPNEIIVLPESLLKQKYPNI  | 406 |
|            | * * * * *                                                     |     |
| Athro-JHEH | IRARKMPKGGHFAAFEQPQLLADEVWTSIGIMEADKKQRE-DKLKKS-              | 463 |
| Nasvi-EH1* | LRVTKMPRGGHFAVLEEPQLLADDIWASVQAFRDYAAQERLEKQKS                | 466 |
| Apime-EH   | IQYNIISRGGHFAAFEEPRLLADDIFSFKKIENLTSKSS-----                  | 446 |
|            | * * * * *                                                     |     |

**Fig. S2.** Amino acid sequence alignment of *Nasvi-EH1* from *Nasonia vitripennis* with epoxide hydrolase genes from *Apis mellifera* (*Apime-EH*) and *Athalia rosae* (*Athro-JHEH*), using CLUSTAL W analysis. Name of gene sequences are given to the left and amino acids are numbered to the right. Identical amino acid positions are indicated by asterisks.

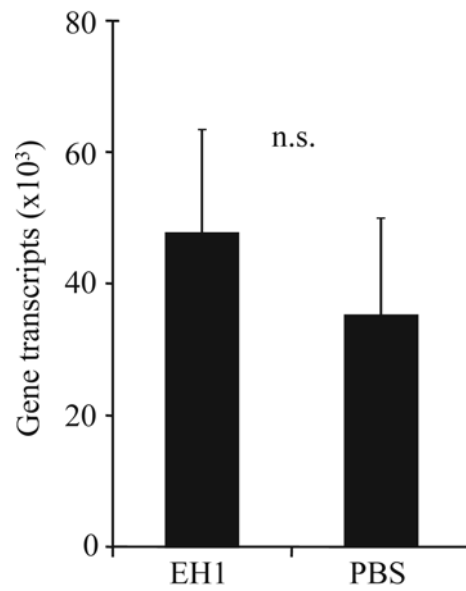

**Fig. S3.** Effect of the injection of dsRNA corresponding to *Nasvi-EH1* (EH1) on the quantity of gene transcripts of the nontarget gene *Nasvi-EH2* in male rectal vesicles as estimated by quantitative real time RT-PCR analysis. Control males were injected with 1× DEPC-PBS buffer. No significant differences were found (t test for independent samples).

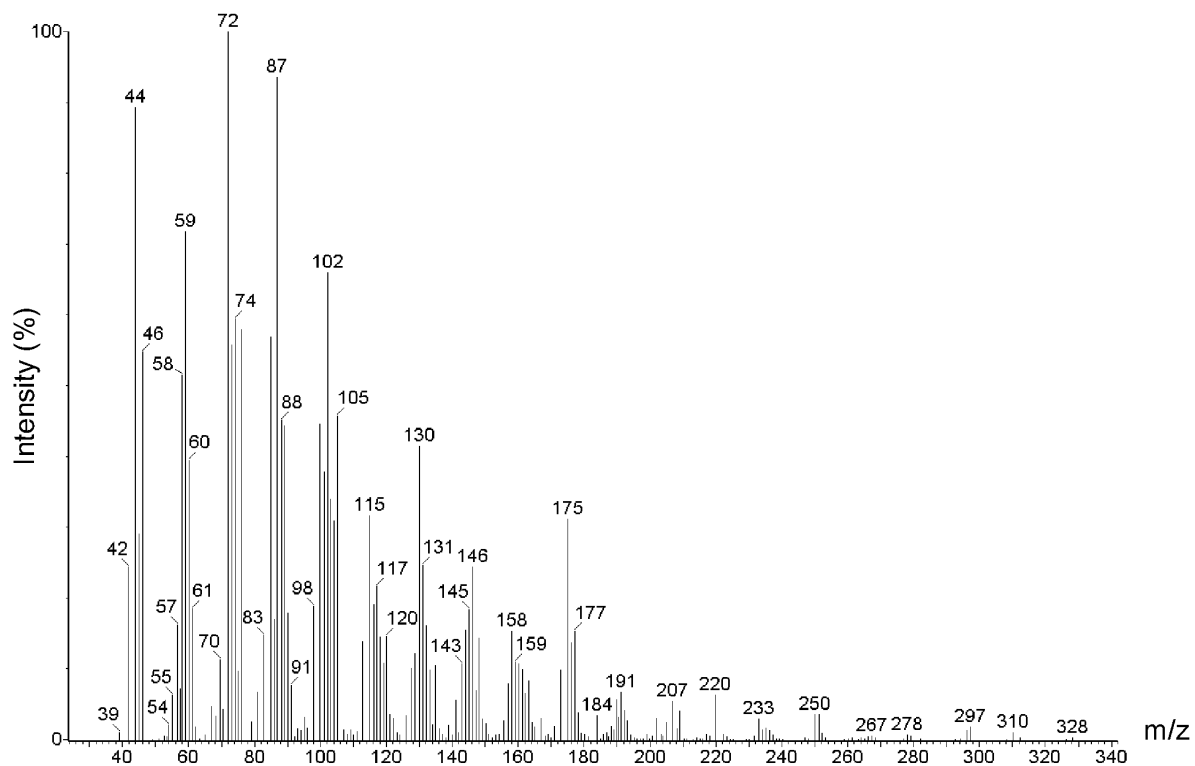

Fig. S4. Mass spectrum (EI, 70 eV) of synthetic (±)-[<sup>13</sup>C<sub>18</sub>]-vernolic acid methylester.

```

Trini-JHEH      -----MARLLFI-LPVLALVFLPVYFLFLQSPPPVNVDMNDWVG-----PESAKEKQDTS 50
Trini-mEH      -----MGRLLFL-VPVLAIVLLPVYFLFLQSPPLPDLDYNEWVG-----PESGKQKQDTS 50
Bommo-JHEH     -----MSRLLFIALPLLVLASIPLYLVLVKSPPMPKLDLEEWVG-----PPELKQKQDTS 51
Spoex-JHEH     -----MG-FIVKAVLVAALGVAAYFYIGCCPKTIPKLDNNEWVG-----PKELVGKQDNA 50
Manse-JHEH     -----MYKILSSFVAGVAIGSGLVITYVLYNVPEPELDLQRWVG-----IGTRPTEEDKS 51
Nasvi-EH2      -----MWKGAAVFLLATLAIGWHLRYGQPVVPEPLPNQYWG-----PGKP-VPDPKD 46
Apime-EH       -----MYPHFHYLFS-----VNELNVPTLPETNWG-----SKKN-EKESIE 36
Athro-JHEH     -----MTILKYSLIGVGLVIG--ISYLFNQGGNQKAPKLDQWVG-----PGKE-QKIVKD 48
Nasvi-EH1*     -----MGVLLWGLGIVLIGG--ATIFISPP-VQPPKLTVDVYWG-----PGDEPKKTDTS 48
Trica-EH       ---MGCCGVIVTAIAVIFILKRVHKIKRPFKVPVTVPYLEETWVG-----PRDK-TEEDDS 51
Trica-mEH      ---MNALIKFVILLIALAIGNVIYKIN--TKESVKVPPEWVG-----PGDP-SKEDTR 48
Ctefe-JHEH2    -----MSNCCRILWIAIVIGLGVLYEITKEFPKPNIPLDTWVG-----TGKS-QKIDTS 49
Ctefe-JHEH1    -----MGKCCRMLIFAAIAGIAVLYYQITKELPKPNIPLDTWVG-----PGKP-QNVDIS 49
Drome-mEH      --MANIWRILVGLTILVAVGYKNYRDLSPGKRPDLDNNAIWVG-----PTLKEPYRENK 54
Drome-JHEH2    --MANIWRILVGLTILVAVGYKNYRDLSPGKRPDLDNNAIWVG-----PTLKEPYRENK 54
Drome-JHEH1    MGVTVKILVLILAIAGGLV--YRNVTLQWADLPAPKLDPQEWGDEAQPKDYEAYLKN 57
Drome-JHEH3    -MKCLIVFGLIVALFGAFVGYGVVFTLTKPLKPEFKDDTYWG-----PGDAKDFVPE 55
Aedae-EH1      --MGFCARLVFVGATLLAVSYKQKDATGPLVPVSLDPNEYWG-----PGDVRQYKEDV 53
Anoga-EH       --MGFMLRVLVFGISLATAVVKYRNLTAPEVPDLNMQYWG-----PGDVKQYREDT 53
Aedae-EH2      --MGFAGRFVLTFTLLVGVLFKVFQDLSAPAAI PAIDYQEYWG-----PGDVKNKENV 53

                                                     **

Trini-JHEH     --IRPFKISFGNNNVKDKDRLQRTRPLTPPLEGVGFDYGFNTNEIDSWLKYWAKDYN-- 106
Trini-mEH     --VRPFKINFGENLVKDKDRLKRTRPLTPPLEGVGFEYGFNTNEINSWLKYWAEGYN-- 106
Bommo-JHEH     --IKPFEITFSETMVELKERIKKRRPFAPPLEGVGFKYGFNSKQLDSWLKYWAEYYP-- 107
Spoex-JHEH     --IRPFKVFDEAMIKDLKRLKNHRAFRRPPLLEGVGFYGFNTAQIDSWINYWADKYN-- 106
Manse-JHEH     --IRPFSIDFNTVILDKERLKNRRPPTKPLEGINSEYGMNTEYLETVLEYWLNENY-- 107
Nasvi-EH2     --IKPFKIDVPEVIDDLNKRDLSTRSFVEPLEGSAWYGISSTYLKTVLHNWRKKNY-- 102
Apime-EH      --IRPFKIDVSKSVLDDLKYLRAHRRTPFKKPLENVGWTYGISSTYLTNTVLDYWRDKYN-- 92
Athro-JHEH     --VVPFKVNFSGKGDIEDLTKRLKNTRNLTPELENAGWYGVGKFPVKIVDYWLKNKYD-- 104
Nasvi-EH1*     --VRPFKITFQKEMLDLNRNLRNTRKMQLPLENVGWTYGLSGDFVPVIVDHWLNKYD-- 104
Trica-EH      --IQPFTVKVPDEVI TDLQQLQNARPLTPPLEGVQHGYGINTNLLKKIVDFWRNEYN-- 107
Trica-mEH     --IVPFKIQVNPQILEDLRQLKNARKFAPPLEGVHQHYGINTNLLKEIVNYWLTKYD-- 104
Ctefe-JHEH2    --MRPFKIAINDEVNNTLKVKLSDFS-FTPPLEGIDFYGFNTNLLKLVDWFWRQYN-- 104
Ctefe-JHEH1    --IRPFKININNKVIENLKLKLVQ-VYTLPLEGINFEYGFNTSLKKIVDFWRQYN-- 104
Drome-mEH     -AILPFDISVKPEVIDELIGQLSRPLKAQAPLEGVGFYGFNANELAKVVKYWRDTPYLPK 113
Drome-JHEH2    -AILPFDISVKPEVIDELIGQLSRPLKAQAPLEGVGFYGFNANELAKVVKYWRDTPYLPK 113
Drome-JHEH1    SEVIGNRLSYPKTIADLKERLNRTRLTTPPLEGVAFYGFNTNYLKEVVEYWRDDYLP 117
Drome-JHEH3    -KIYEFKLQVPQSEIDDLRKLNRTRLTPELDGIAFEYGFNTYALEQVFVYWRDNYLTK 114
Aedae-EH1     -SIKPFKVAVSPEVIEKLRSLKLVPTLVKPLEGAAFEYGFNSNRLQDILKYWTSYLNK 112

```

Fig. S5. CLUSTAL W amino acid sequences alignment of the epoxide hydrolase genes of *N. vitripennis* (*Nasvi-EH1\**), (*Nasvi-EH2* = GenBank accession no. XP\_001602953), *Apis mellifera* (*Apime-EH*), *Athalia rosae* (*Athro-JHEH*), *Manduca sexta* (*Manse-JHEH*), *Bombyx mori* (*Bommo-JHEH*), *Spodoptera exigua* (*Spoex-JHEH*), *Trichoplusia ni* (*Trini-mEH*, and *EH*), *Drosophila melanogaster* (*Drome-JHEH1*, *2*, and *3* and *mEH*), *Aedes aegypti* (*Aedae-JHEH1*, and *2*), *Ctenocephalides felis* (*Canfe-EH1*, and *2*), and *Tribolium castaneum* (*Trica-EH*, and *mEH*). Gene names are given to the left, identical amino acid positions are indicated by asterisks.

|             |                                                                   |
|-------------|-------------------------------------------------------------------|
| Anoga-EH    | -SIKPFKVSYDAAVIEKLRGKLTDPKLTPLDGVAFYGFNTNRLQDILKYWRTTYLDK 112     |
| Aedae-EH2   | -EVKSFELNYGEDVIGKLRNRLDDVPKFAEPLGTAFEYGFNSKKLGBILKYWRSDYLER 112   |
|             | * * ** * *                                                        |
| Trini-JHEH  | FKERETFLNQFPQFKTNIQGLDIHFIRVTPKVPQG--VEVVPLLLHGWPGSVREFYEA 163    |
| Trini-mEH   | FKERETFLNQFPQFKTNIQGLDIHFIVKVPKVPAG--VQVVPMLLLHGWPGSVREFYEA 163   |
| Bommo-JHEH  | FAERQKFLNQYPHFKTNIQGLNIHFMRITPKVPKD--VEIVPLLLHGWPGSVREFYEA 164    |
| Spoex-JHEH  | FSEREAFLNKFPFKTNIQGLDIHFIRVKPEVPKN--VEVLPMLLHGWPGSVREFYEA 163     |
| Manse-JHEH  | FKKRAELLNKFPYKTRIQGLDLHFIRVKPEIKEG--VQVLPMLMHGWPSSKEFDKV 164      |
| Nasvi-EH2   | WSQRQALLNKYPQFKTKIQGLDIHFYHVKQVPKDRK-VRVLPMLLHGWPGSVREFYQKI 161   |
| Apime-EH    | WTERQALLNKYPQFMTTIQGLDIHFYHVKNLNNKN-LKVLPLMLHGWPGSVREFYQKI 151    |
| Athro-JHEH  | FKKREQYLNQYDQFVTNIQGLNIHFVLR--PKNSGGKRVLPPLIQHGWPVVEFYKI 161      |
| Nasvi-EH1*  | FKKREAHLNQYQFITNVQGLDIHFVHKVQLPKNSK-IQVLPYLYQHGWPGSVREFYQKI 163   |
| Trica-EH    | WKERETFLNKLQFVTSVQGLRLHYHVK--EKT-DGLKVLPLMLHGWPGSVREFYEI 164      |
| Trica-mEH   | WRERENFLNQYQFKTNIQGLDVHFVHVK--KNVPSGVKTQPLLLVHGWPVVEFYEI 162      |
| Ctefe-JHEH2 | WREREALNKYPHFKTNIQGLDIHVHIKPVSKN--IHVLPMMHGWPGSVREFYKI 161        |
| Ctefe-JHEH1 | WREREALNKYPHFKTNIQGLDIHVHIKPVSKN--IEVLPVMHGWPGSVREFYKI 161        |
| Drome-mEH   | WSEREYLLKLDHYQTEIQGLKIHFHAKPSQVKGQPKKVLPLMLHGWPGVREFYDF 173       |
| Drome-JHEH2 | WSEREYLLKLDHYQTEIQGLKIHFHAKPSQVKGQPKKVLPLMLHGWPGVREFYDF 173       |
| Drome-JHEH1 | WREREVFLWQFNHFTDIQGLRTHFLHLMVYDDNKVG-KKHYPVLLHGWPGSVREFYDF 176    |
| Drome-JHEH3 | WDERQELFNFSFKYKTEIQGLNIHYIHEKVSEEAKEK-KHVYPLLLHGWPGSVREFDF 173    |
| Aedae-EH1   | WTEREAFLNKFPFKTNIQGLNIHFVHKVPKVPAGTK--VLPLLLHGWPGSVREFYDV 169     |
| Anoga-EH    | WSEREKFLNKFPFKTNIQGLNIHYHVKVPKVPAGTK--VLPLLLHGWPGSVREFYDI 169     |
| Aedae-EH2   | WDERQKYLNRFPQFKTNIQGLDIHFVLRVKPEVQNPKR--IVPLMLHGWPGSVQKFEYI 169   |
|             | * *** * * **** *                                                  |
| Trini-JHEH  | IPLLTAV--SKDRDFAFEVIVPSLPGYGFSDPAVRPGLGAPQIGVVMKNLMSRLGYKQFY 221  |
| Trini-mEH   | IPLLTAV--SKDRDFAFEVIVPSLPGYGFSDGAVRPGMGAPHIGIIMRNLMLRGLGYKRYF 221 |
| Bommo-JHEH  | IPHLTAV--SRDRNFALEIIAPSLPGYGFSDAAVRPGLAAAEVAVIFKNLMARLGYKQYY 222  |
| Spoex-JHEH  | IPLLTRQ--TAGYNFVFELIIPSLPGYGFSDPAVRPGLGMPQVAVIFRNLMLRGLGHKKYY 221 |
| Manse-JHEH  | IPILTTP--KHEYNI VFEVAVDLPGYGFSEGTNKPGLNPFVQIGVMMRNLMLRLGFEKFY 222 |
| Nasvi-EH2   | IPMLTTA--KPDENFVFELIIPSLPGYGFSAARPGLGPAQMAVVFKNLMQRLGFEQFY 219    |
| Apime-EH    | IPMLTKP--WPNQN FVFEVIVPSLPGYGFSEGAVRPGMANAQIAVIFKNLMQRLGFEKFY 209 |
| Athro-JHEH  | IPMLTTP--RDDYDFVFEVIAPSLPGYGFSGAVRPGLGAAQIAVVLKNLMLRLGFNKFY 219   |
| Nasvi-EH1*  | IPMLTTP--RSDRN FVFEVAVPSLPGYGFSAASKAGLQVMAHLMKNLMLRLGFDKFY 221    |
| Trica-EH    | IPLLTKP--QPGRDFVFEVIAPSLPGYGFSEAAVRPGLGAIQMAVLPKFMNRLGFQKYY 222   |
| Trica-mEH   | IPLLTTV--QDKK FVFEVIVPSLPGYGFSAAVRPGLAGHQTAVIFKNLMKRLGFDREY 220   |
| Ctefe-JHEH2 | IPMLTTP--RTDYNFVFELIIPSLPGYGFSAAPGLGATQIAVIMHNLMDRIGFKKYY 219     |
| Ctefe-JHEH1 | IPMLTTP--RAGYNFVFELIIPSLPGYGFSAAPGLGSTQVAVIMRNLMERIGFKKYY 219     |
| Drome-mEH   | IPLLTTP--SDKSDYVFEVIAPSLPGYGWSQSSKTGFVGAQVAVVMRNLMLRVGFDKFL 231   |
| Drome-JHEH2 | IPLLTTP--SDKSDYVFEVIAPSLPGYGWSQSSKTGFVGAQVAVVMRNLMLRVGFDKFL 231   |

Fig. S5. (Continued)

|             |                                                               |     |
|-------------|---------------------------------------------------------------|-----|
| Drome-JHEH1 | IHLHLQTNLNDNNKYIFNVVPSLPGYGWSQGTSRKGGLGPAQVAVMMRNLMRLRLGYNKFF | 236 |
| Drome-JHEH3 | IPMLTKH--SNITDYAFEVVAPSLVGYGWSDAATRPGFNAAEMATVMRNLMLRLGHKKFF  | 231 |
| Aedae-EH1   | IPKLTTK--SDDKDFVFEVVVPSLPGYGWSEGASKQGLSPSRIAVIMKNLMDRVGHKKFY  | 227 |
| Anoga-EH    | IPLLTTS--SKDKDFVEVIVPSLPGYGWSQGSAKKGLSPSEVAIVMKNLMRSVGFEEQFY  | 227 |
| Aedae-EH2   | IPRLVAR--SDDKEYVFEVIVPSLPGYGFSQGASKQGLSPAKIAVIMRNLMARLGFKKYY  | 227 |
|             | * * * * *                                                     |     |
| Trini-JHEH  | LQGGDWGALIGNCIVTLFPKDILGYHTNMPIVMSAKSTLFELLGSVFPSSLILEDMSTYER | 281 |
| Trini-mEH   | VQGGDWGSVIGTSLATFFPEEVLGYHANIGLVLSTKAMVWQAIGSVWPSLIMDDLVLVD   | 281 |
| Bommo-JHEH  | VQGGDWGALIGSAMATSPFKEIIGFHSYMALTLSPAATFLEFVGALFPSLIVEP-ELANR  | 281 |
| Spoex-JHEH  | VQGGDWGAGIVSTMSTLFPEDILGHHSNMLFTQHTCATVRTLVGAFPLSLIEE-HLASR   | 280 |
| Manse-JHEH  | IQAGDWGSQLATHMATLFPDQVLGLHTNMLSSRPLSTVCLFVIGALFPSLIVDA-KYMDR  | 281 |
| Nasvi-EH2   | TQGGDWGSLITANMAVLVYPPKVIKIGHLNMCPIESHKAHFLSLVAYIPSLVVDS-EHYSK | 278 |
| Apime-EH    | VQGGDWGSIASDMAVLFPKEIIGLHNNMCTSLNLSNLFVWLVGTYFPSSLIGAN-EHYSK  | 268 |
| Athro-JHEH  | TQGGDWGAIITAHMAVLPPEHVLGIHNSMCAVLQPQTFFTTYLYSYWPSLLVPD-EDYHL  | 278 |
| Nasvi-EH1*  | TQGGDWGAVIGANMASMPQHVLGMHNSMCLVVRPWTWLKIAAYSMLPSSLIPED-E-RQL  | 279 |
| Trica-EH    | IQGGDWGAVITQHMATLYPEKILGLHNSMCFINTLKSQVCLFVLFVYPTLIVKQ-EHVNK  | 281 |
| Trica-mEH   | VQGGDWGSAVTSAMALYYPDRVKGHNLNMCVSNYSYLAKLLAGSVWPSLVVEE-KQKHK   | 279 |
| Ctefe-JHEH2 | VQGGDWGSRIVSAMSTLFPENVLGHNSNLCPLNLTSSNICKSFGSLFPEWFAGQ-QNVHK  | 278 |
| Ctefe-JHEH1 | VQGGDWGSMIISAMSTLFPENVLGQHSNMCVNTTPSSNIKAIIGSFPESEFAGT-GNAHK  | 278 |
| Drome-mEH   | VQGGDWGSIIGSNVASFPEENVLGYHNSMCGNNSPMGQLKMVLASFFPSWFDVSE-YADF  | 290 |
| Drome-JHEH2 | VQGGDWGSIIGSNVASFPEENVLGYHNSMCGNNSPMGQLKMVLASFFPSWFDVSE-YADF  | 290 |
| Drome-JHEH1 | IQGGDWGSIIGSNLATYPENVLGYHNSMNNLSPKSLAKGLVAEFWPSLFPVPSG-FEDF   | 295 |
| Drome-JHEH3 | IQGGDWGSIIGSNLATYPENVLGYHNSMNVLHTPLAILKGIYGSFFPEKYLPFRFFVDH   | 291 |
| Aedae-EH1   | VQGGDWGSLIANLISTLYQDNVLGVHNMCGANGLQAILKSIIASFRPSMFIEEK-YVDY   | 286 |
| Anoga-EH    | IQGGDWGSLIGNIATYFQSNVLGVHNMCSIMTPLSYPKMFLAALKPSLFIDEQ-YTDF    | 286 |
| Aedae-EH2   | VHGGDWGSIIGNLMATFFQDEVGLGVHVTMCMTAPIGTNLKILGAVAPSLVVEESQ-YKDF | 286 |
|             | **** * * *                                                    |     |
| Trini-JHEH  | LYPLSTRFANLLRETGYMHIQSTKPDVTGVALSDSPAGLLAYILEKFPATWTRPDLMSPKN | 341 |
| Trini-mEH   | IYPLSKTSLFQVRESGYLHIQASKPDTVGVALTDSPAGLLAYIVEKFSIWTRPELTSKPN  | 341 |
| Bommo-JHEH  | LYPLSEKYSTLLEELGYMHIQATKPDVTGIGLTDSPAGLLAYILEKFSWTWNPDLRSKED  | 341 |
| Spoex-JHEH  | IYPLSSFFAYVLEEFYMHIQATKPDVTGVPLSDSPAGLLAYILEKFSWTWKKEYKFKAG   | 340 |
| Manse-JHEH  | IYPLKNLFSYILRETGYFHIQATKPDVTIGVALTDSAGLAGYLIEKMAICSNRDQLDTPH  | 341 |
| Nasvi-EH2   | MYPLSYHFGRLIEETGYLHIQATKPETVGAALTDSPAGLAAYILEKFSWTWNPDYFRDD   | 338 |
| Apime-EH    | FPFVSEILSFLIEESGYFHIQATKPDVTIGAAALTASPDAAYILEKFSVWTKTYKKQDD   | 328 |
| Athro-JHEH  | MYPLSKKWSRTIEETGYFHIQATKPDVTLGAALADSPAGLAAYILEKFSWTGNPELRFKED | 338 |
| Nasvi-EH1*  | MFPLSTKLALGIEETGYLHLQATKPDVTIGVSDSPAGLAAYILEKMACTKPDNKFTDD    | 339 |
| Trica-EH    | VYPLSSKFAKTLLLETGYMHLQATKPDVTGVALNDSPIGLAAYILEKFTWNTNPAWRDLED | 341 |
| Trica-mEH   | IYPLSNYSNALLEFGYMHQATKPDVTIGVALNDSVGLAAYIIEKFTWNTNPEWKNRAD    | 339 |
| Ctefe-JHEH2 | IYPLSEHFFTLLEESGYFHIQATKPDVTGVALRDSAPAGLAAYILEKFSWTGNKAWSAKD  | 338 |

Fig. S5. (Continued)







(A)

|                  |                                                                                                                                                            |     |
|------------------|------------------------------------------------------------------------------------------------------------------------------------------------------------|-----|
| <i>Nasvi-EH1</i> | MWKGAAVFLLATLAIGWHLRYQGPVEVP-DLPNQYWGPG-KPVPDPKDIKPKIDVPKEV                                                                                                | 58  |
| <i>Nasvi-EH2</i> | MGVLLWGLFGIVLIGGATIFISPPVQQPPKLTDVYWGPGDEPKKTDTSVRPFKITFQKEM                                                                                               | 60  |
|                  | *        ** *        ** *        *****        *        **** *        **                                                                                    |     |
| <i>Nasvi-EH1</i> | IDDLNKRDLSTRSFVEPLEGSAWTYGISSTYLKTVLNHRKKNWSQRQALLNKYPQFKT                                                                                                 | 118 |
| <i>Nasvi-EH2</i> | LDDLNRNRLKNTRKMQLPVENVGWTVYGLSGDFVPVIVDHWLNKYDFKKREAHLNQYPQFIT                                                                                             | 120 |
|                  | ** *        **        *        *        *        *        *        **        **        *        *        **        **        *                             |     |
| <i>Nasvi-EH1</i> | KIQGLDIHFYHVKQPVPKDRKVRVPLPLMLLHGWPGSIVEFQKIIPMLTTAKPDENFVFEV                                                                                              | 178 |
| <i>Nasvi-EH2</i> | NVQGLDIHFYHVKQPVPKNSKIQVLPVLYLQHGWPGSIVEFQKIIPMLTTPRSDRNFVFEV                                                                                              | 180 |
|                  | *****        *****        **        *        *****        *****                                                                                            |     |
| <i>Nasvi-EH1</i> | IIPSLPGYGFSAARPAARPLGPAQMAVVFKNLMQRLGFEQFYTQGGDWSLITANMAVLYP                                                                                               | 238 |
| <i>Nasvi-EH2</i> | VAPSLPGFGYSQAASKAGLGAVMQMAHLMKMNMLRGLGDFKYTQGGDVGAVIGANMAMYP                                                                                               | 240 |
|                  | *****        *        *****        ***        **        *****        *****        *****        *        *****        **                                    |     |
| <i>Nasvi-EH1</i> | KKVIGTHLNMCFIESHKAHFLSLVGAYIPSLVVDSEHYSKMYPLSYHFRGLIEETGYLHI                                                                                               | 298 |
| <i>Nasvi-EH2</i> | QHVLMHNSNMCLVVRPWTWVKIAAYSLMPSLLPEDEKQ-LMFPLSTKLALGIEETGYLHL                                                                                               | 299 |
|                  | * * * *        *****        *        *        *        *        *****                                                                                      |     |
| <i>Nasvi-EH1</i> | QATKPETVGAALTDSPAGLAAYILEKFSTWTNPDYRFRDDGGLLEKFTMDELIDNLMVYW                                                                                               | 358 |
| <i>Nasvi-EH2</i> | QATKPDTIGIGVSDSPAGLAAYILEKMAYCTKPDNKFDDGNLLEKFTMDELIDNLMVYW                                                                                                | 359 |
|                  | *****        *        *        *****        *        **        *        *****        *****        *****        *****                                       |     |
| <i>Nasvi-EH1</i> | VTNSITTSQRLYAECFSKANRELGVDKMPIFVPTACANFPHELAYRSETILKERFTNLVQ                                                                                               | 418 |
| <i>Nasvi-EH2</i> | APNKASSSFRIYAESFNKQTFQYKMDNVPVTVPSACAQFPYEIIFQSANFLRDRFVNLLR                                                                                               | 419 |
|                  | *        *        *        *        *        *        *        *        *        *        *        *        *        *        *        *        *        * |     |
| <i>Nasvi-EH1</i> | FTHPPRGGHFAAFEEPELLANDVWSFVHKLQRLSDEKQKQEAKEKAKKA                                                                                                          | 470 |
| <i>Nasvi-EH2</i> | VTKMPPRGGHFAVLEEPQLLADDIWASVQAQFRDYAAQERLEKQKS -----                                                                                                       | 466 |
|                  | *        *****        ***        **        *        *        *        *        *        *        *        *        *        *        *        *        *   |     |

(B)

Nas . EH2 . F1

1 **AAGATCGCGCCTACAGC**CTGATGCCGTCGCTTCTGCCGGAGGACGAGAGGCAGCTGATG

61 TTCCCCTGAGCACGAAACTGGCTTTGGGCATCGAGGAGACCGGTTACCTCCACTTGCAG

121 GCCACCAAGCCCACCATCGGAATCGGAGTGAGCGATTCTCCCGCTGGACTGGCGGCG

181 TACATCCTGGAAAAGATGGCTTACTGCACGAAACCCGACAACAAGTTCACCGACGACGGT

241 AACCTCCTGGAAAAGTTACCATGGACGAGCTCATCGACAATCTCATGATGTACTGGGCG

301 CCGAACAAGGCTAGCAGCTCCTTCCGAATCTACGCCGAGAGTTTCAACAAGCAAACCTTC

361 GGCTACAAGATGGACAACGTTCCAGTAACGGTACCAAGCGCCTGCGCCCAGTCCCCTAC

421 GAGATAATCTTCCAATCGGCCAACTTCCTTCGCGACCGTTTTCGTCAACCTCCTCAGGGTA

481 ACGAAGATGCCTCGAGGTGGCCATTTGCGGGTCTCGAAGAACCCAGCTTCTCGCCGAC

Nas . EH2 . R

541 GACATCTGGGCTTCCGTACAGG**CTTCCGAGACTACTACGCCGCG**

Fig. S6. (A) Amino acid sequence alignment of the putative EH genes *Nasvi-EH1* and *Nasvi-EH2* (GenBank accession no. XP\_001602895) from *Nasonia vitripennis*, using CLUSTAL W analysis. Name of the gene sequences are given to the left, the amino acids are numbered to the right, and identical amino acids are indicated with asterisks. (B) Nucleotide sequence of the *Nasvi-EH2* dsRNA that was used in RNAi analysis. Primer nucleotide sequences are in bold and their names are given above.

**Table S1. Exon/Intron splice sites prediction of the *Nasvi-EH1* DNA gene, using [www.fruitfly.org/seq\\_tools/splice.html](http://www.fruitfly.org/seq_tools/splice.html) tools**

| Start | End | Score | Exon/Intron     |
|-------|-----|-------|-----------------|
| 53    | 67  | 0.65  | atctcaggtatcaag |
| 72    | 86  | 0.88  | cgaggaggtacctga |
| 165   | 179 | 0.89  | aaaagaggtaatcga |
| 393   | 407 | 0.75  | gcccaggtacctaa  |
| 411   | 425 | 0.62  | ccgcaaggtccgtgt |
